# Supplementary material for: Porcine placenta extract improves high-glucose-induced angiogenesis impairment
Source: PubMed Central journal article supplement (PMC7893890; doi:10.1186/s12906-021-03243-z), 2021-02-18
Supplement: 12906_2021_3243_MOESM1_ESM.pdf [file 12906_2021_3243_MOESM1_ESM.pdf]

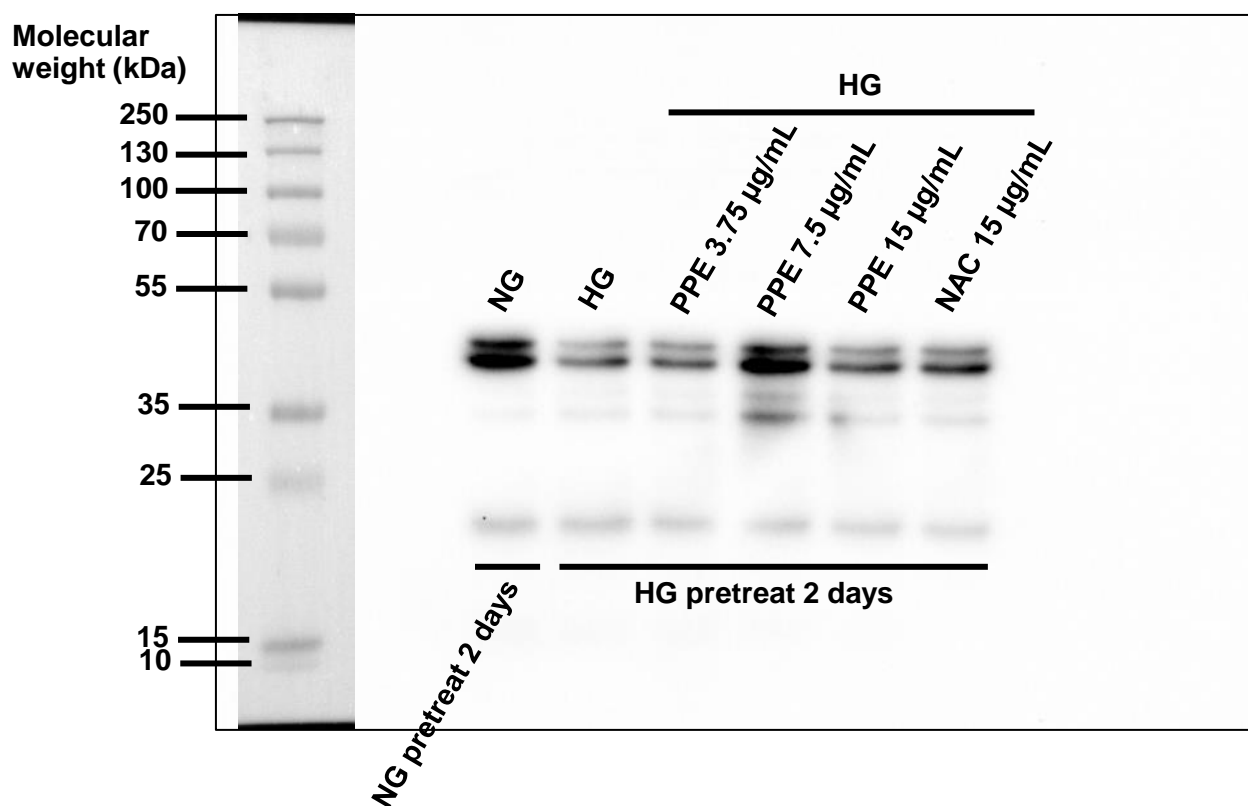

**Supplementary Figure 1** The full-length blot of phosphorylated-ERK1/2 in HUVEC that is presented in figure 6

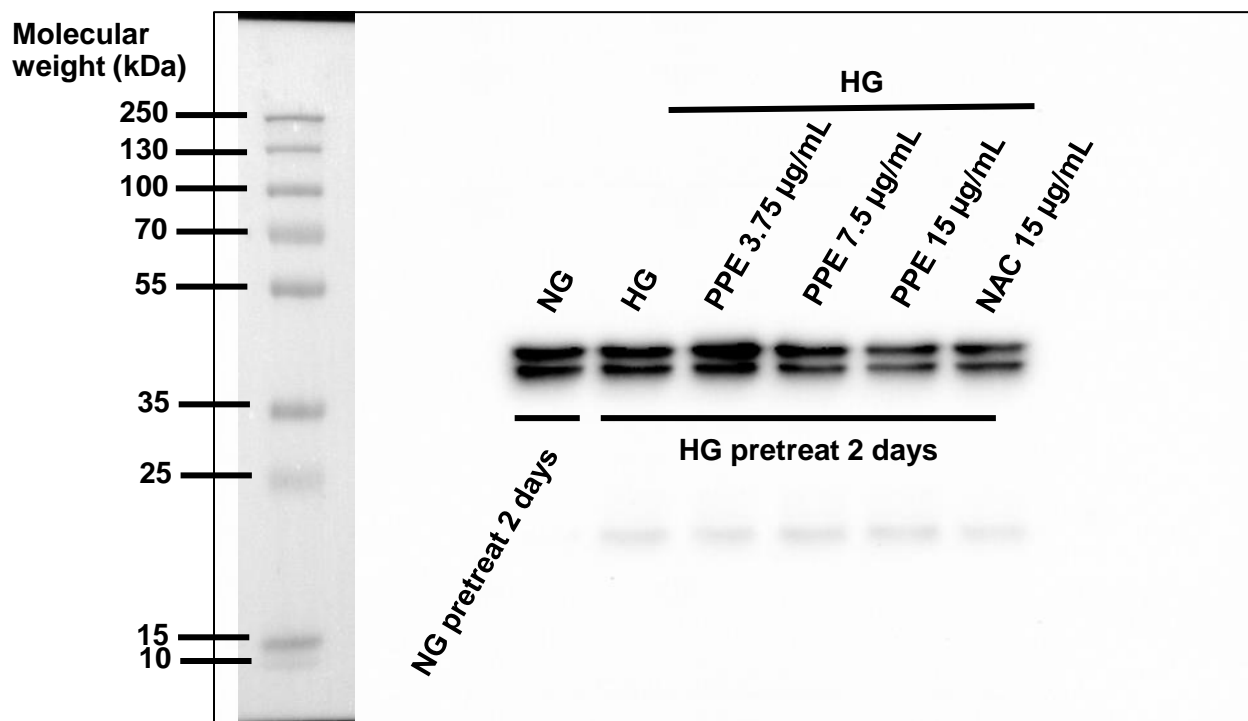

**Supplementary Figure 2** The full-length blot of total ERK1/2 in HUVEC that is presented in figure 6

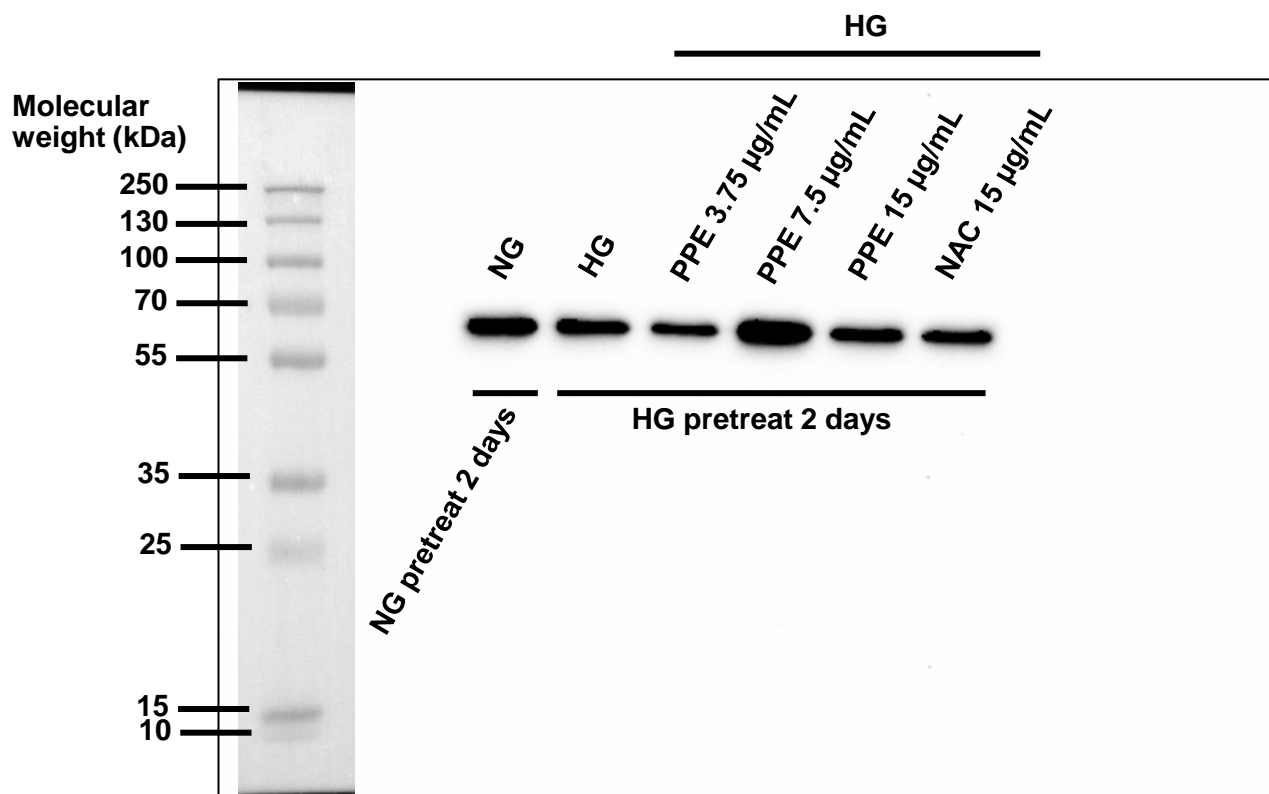

**Supplementary Figure 3** The full-length blot of phosphorylated-Akt in HUVEC that is presented in figure 6

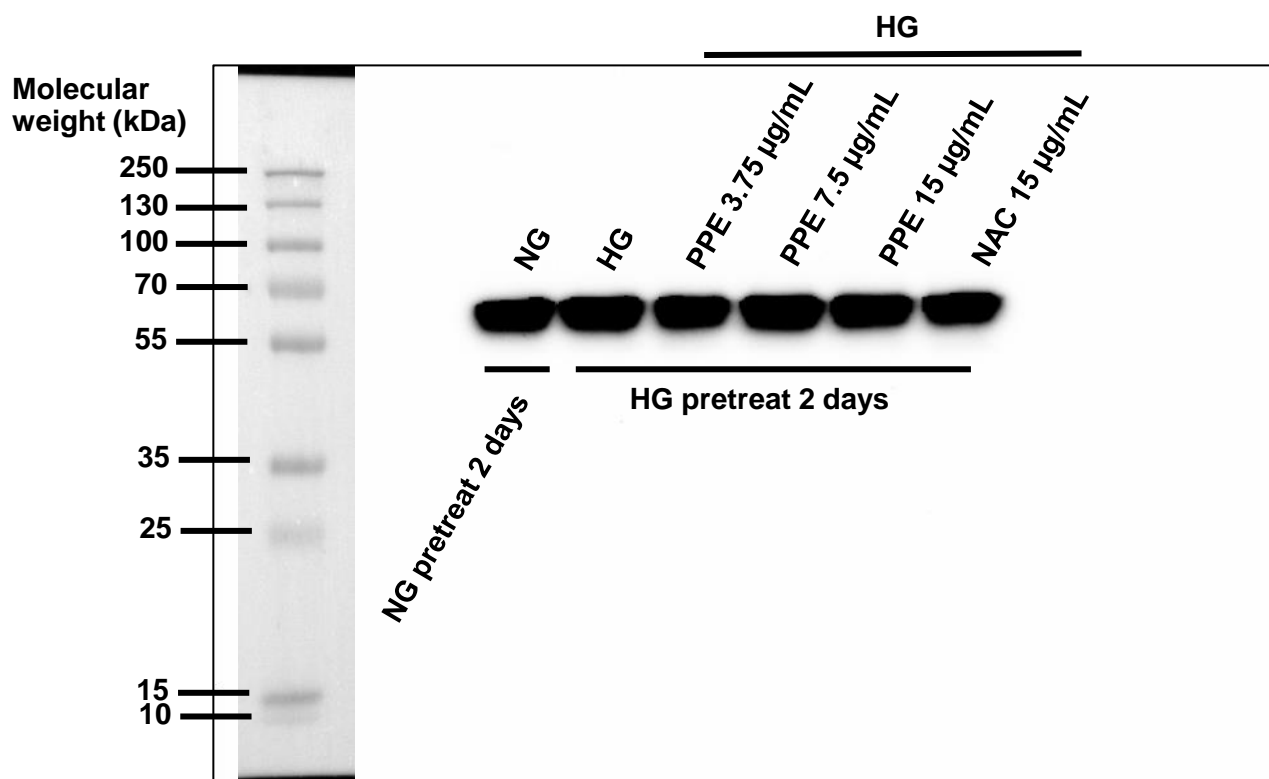

**Supplementary Figure 4** The full-length blot of total Akt in HUVEC that is presented in figure 6

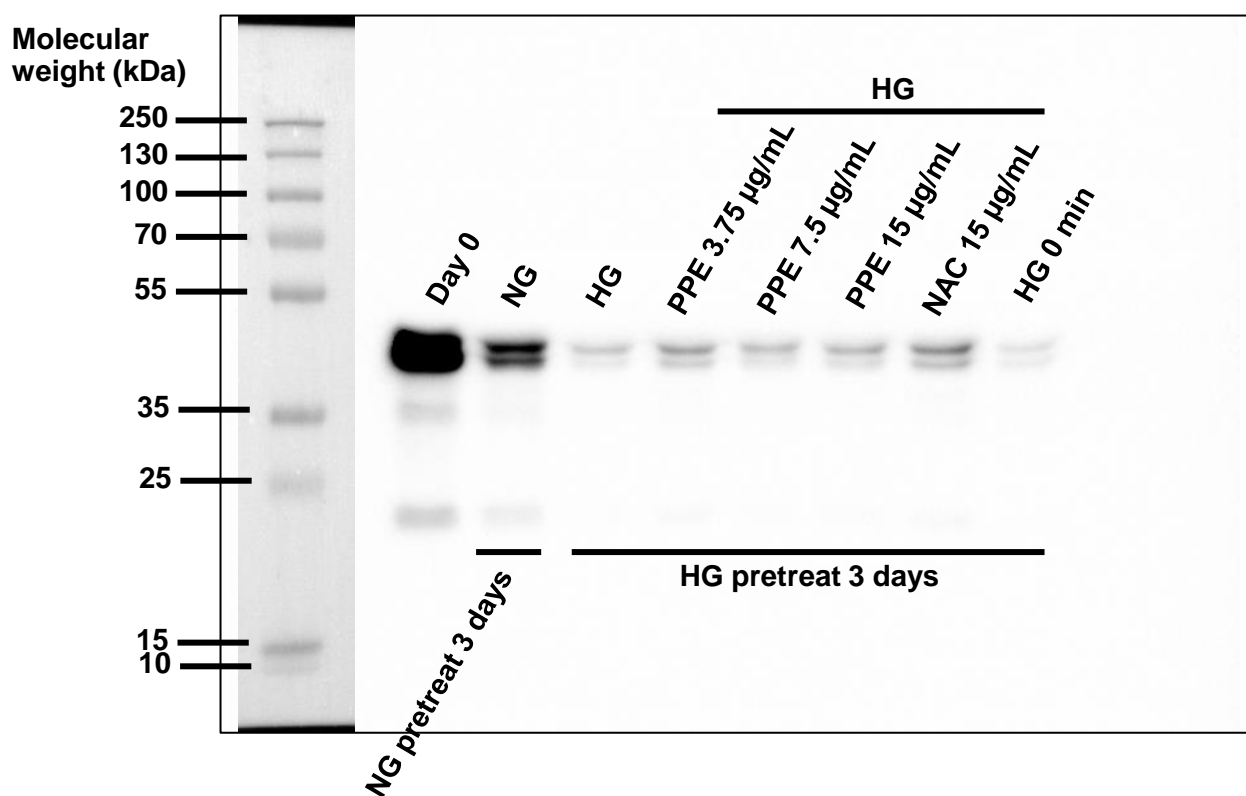

**Supplementary Figure 5** The full-length blot of phosphorylated-ERK1/2 in EA.hy926 that is presented in figure 6

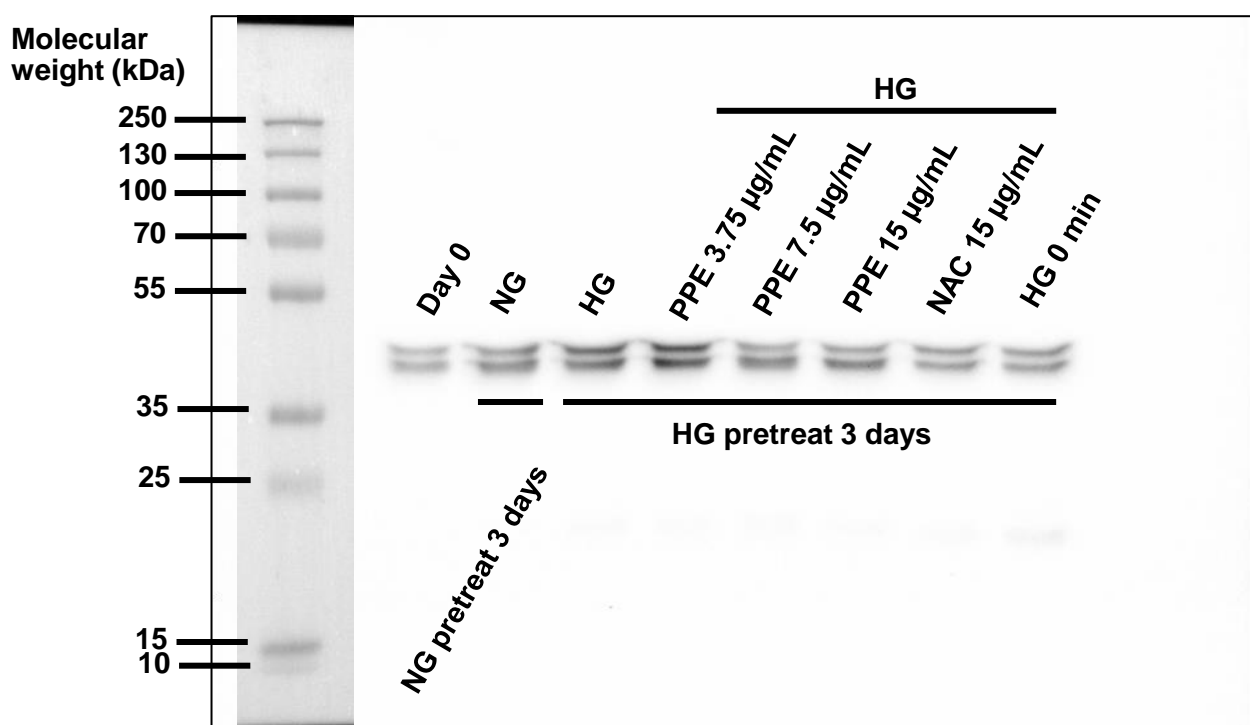

**Supplementary Figure 6** The full-length blot of total ERK1/2 in EA.hy926 that is presented in figure 6

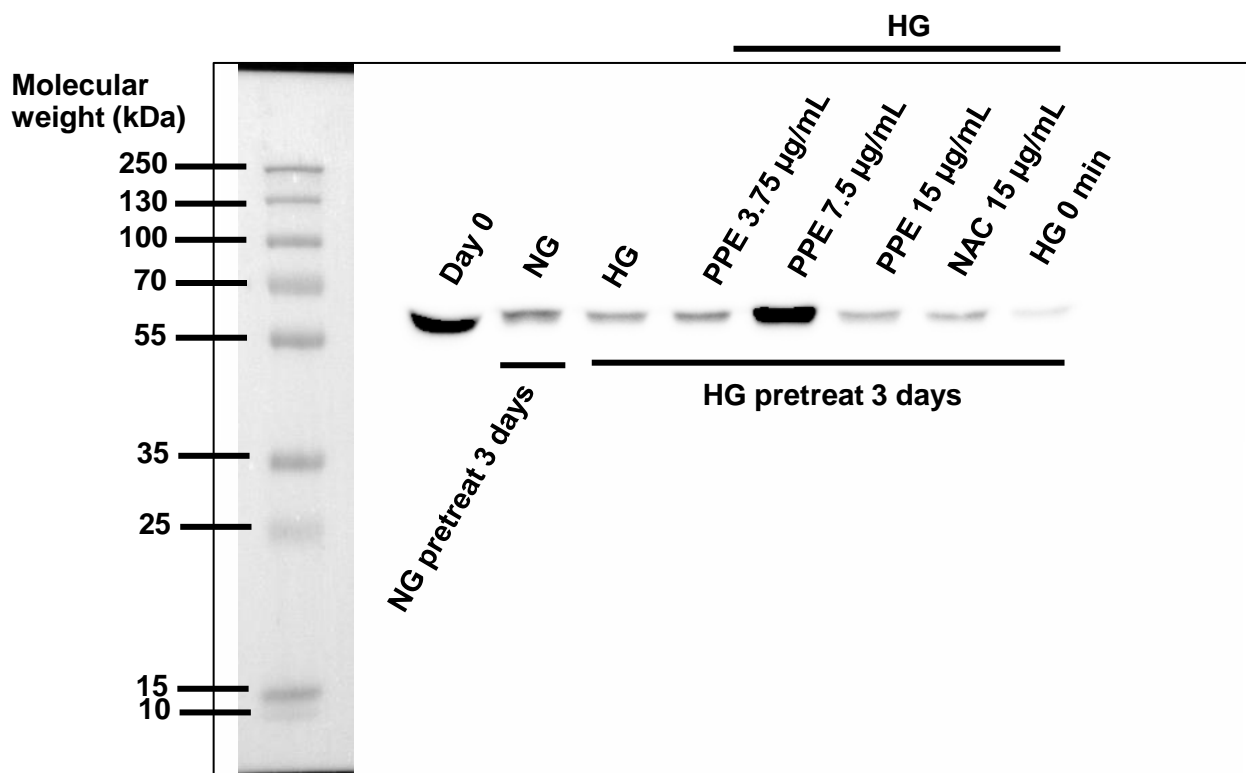

**Supplementary Figure 7** The full-length blot of phosphorylated-Akt in EA.hy926 that is presented in figure 6

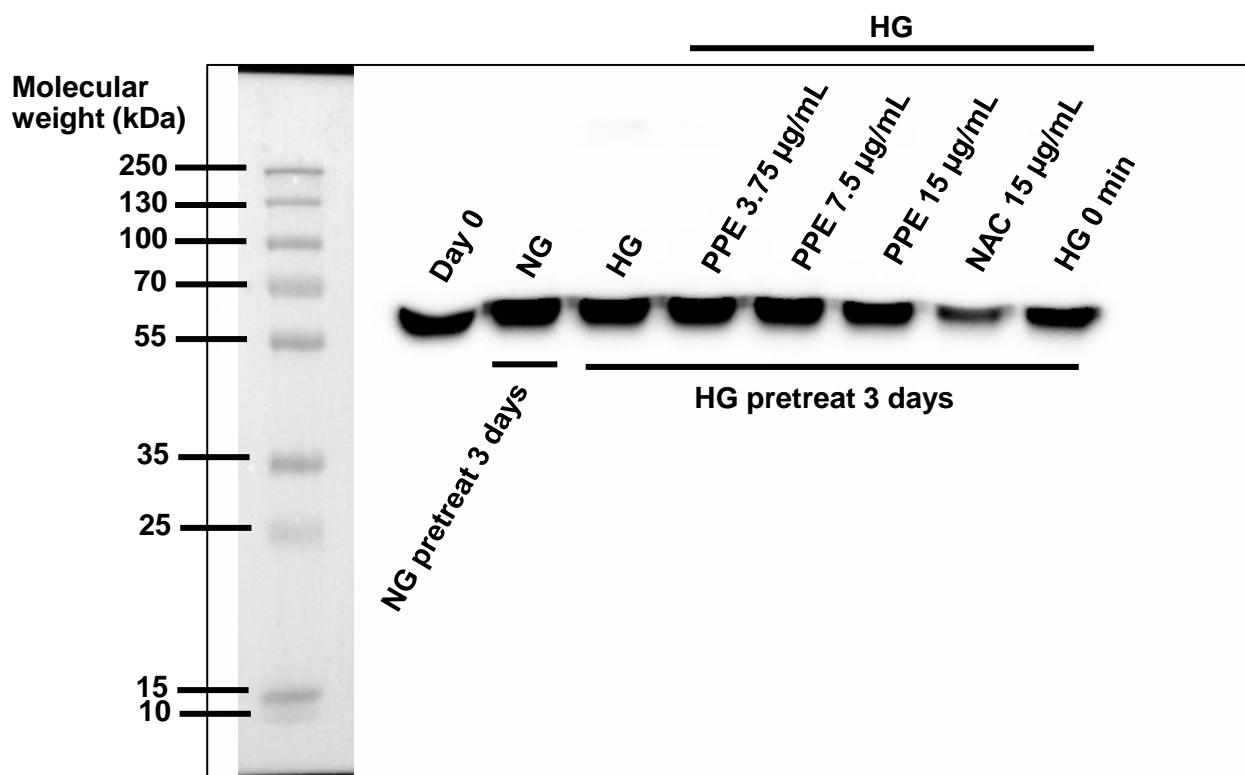

**Supplementary Figure 8** The full-length blot of total Akt in EA.hy926 that is presented in figure 6

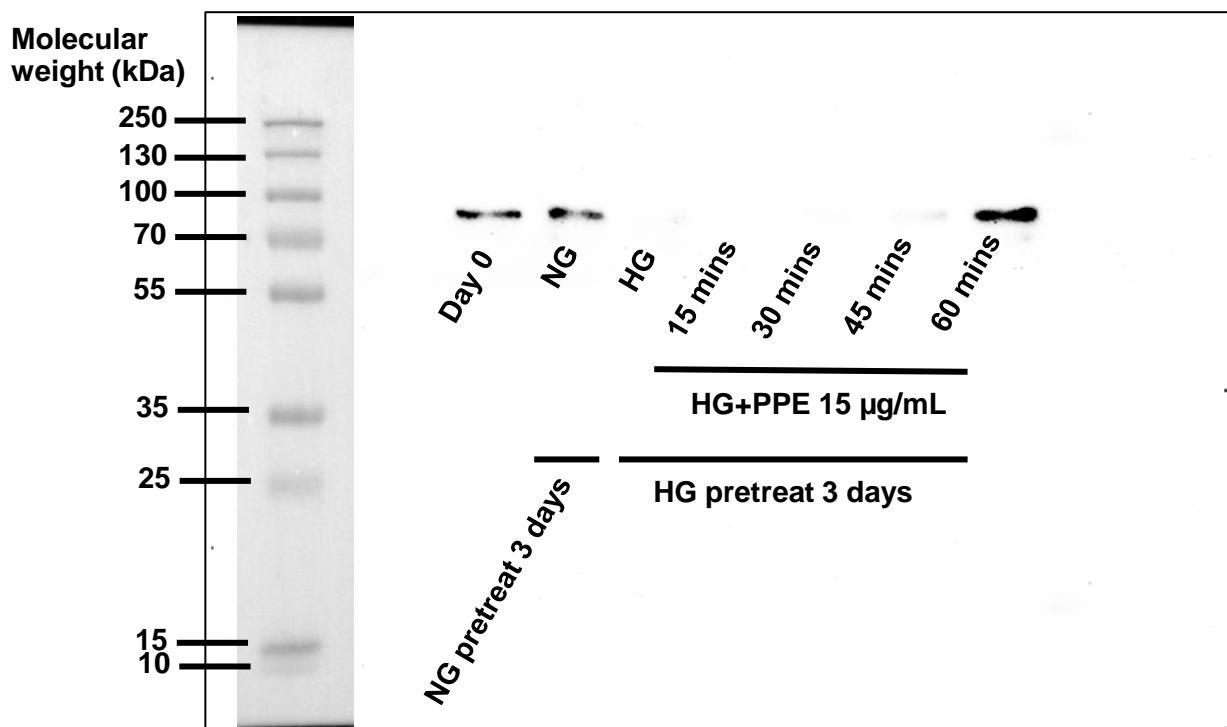

**Supplementary Figure 9** The full-length blot of phosphorylated PI3K in EA.hy926 that is presented in figure 6

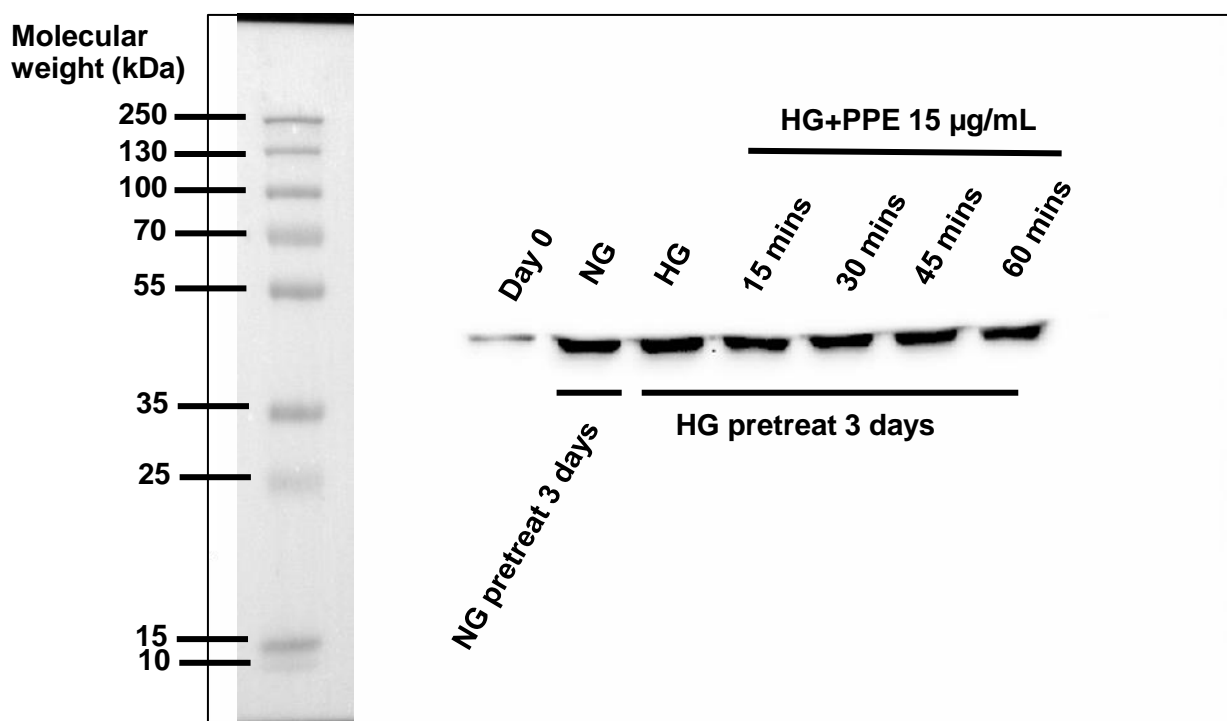

**Supplementary Figure 10** The full-length blot of  $\beta$ -actin in EA.hy926 that is presented under cropped phosphorylated-PI3K blot in figure 6

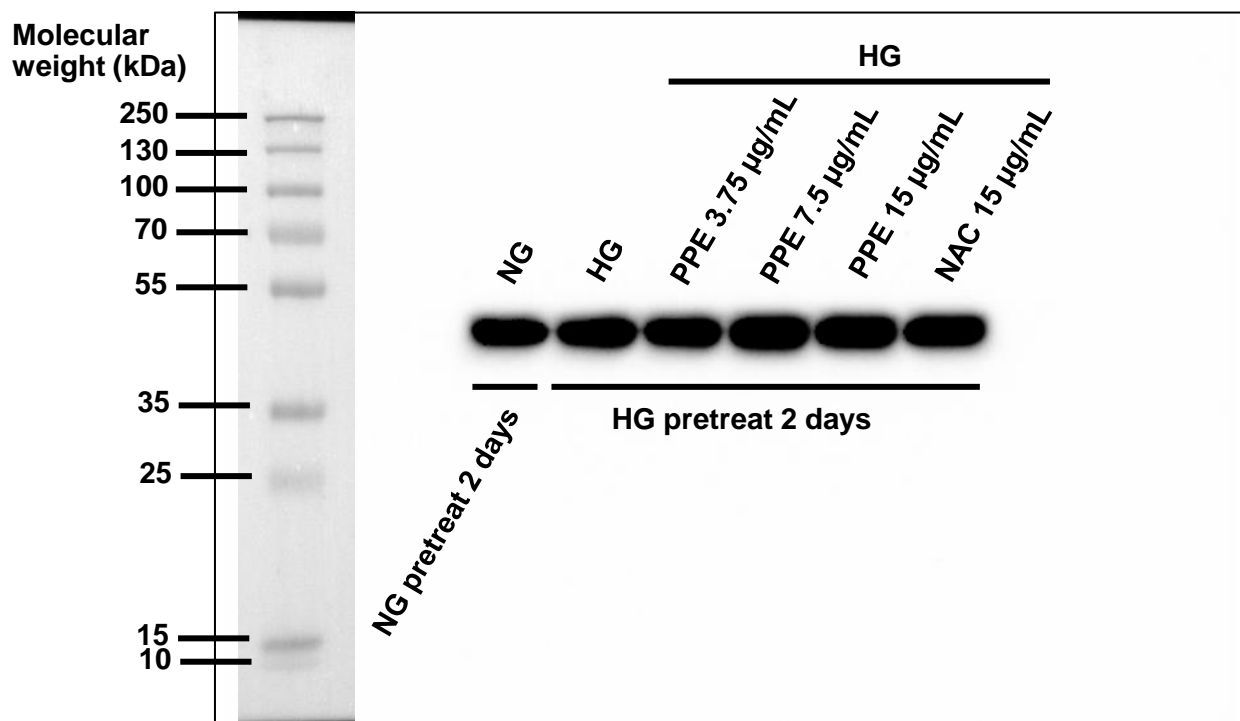

**Supplementary Figure 11** The full-length blot of  $\beta$ -actin in HUVEC that is presented under cropped ERK1/2, Akt, phosphorylated-ERK1/2, phosphorylated-Akt blots in figure 6

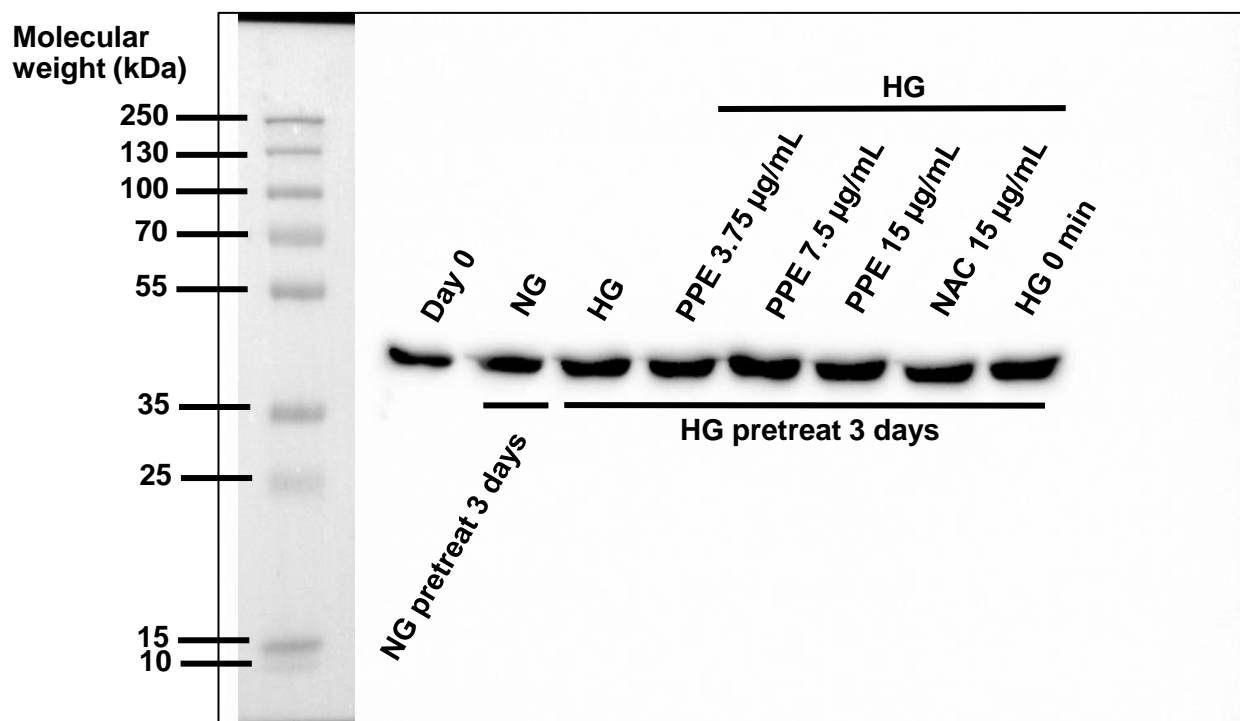

**Supplementary Figure 12** The full-length blot of  $\beta$ -actin in EA.hy926 that is presented under cropped ERK1/2, Akt, phosphorylated-ERK1/2, phosphorylated-Akt blots in figure 6

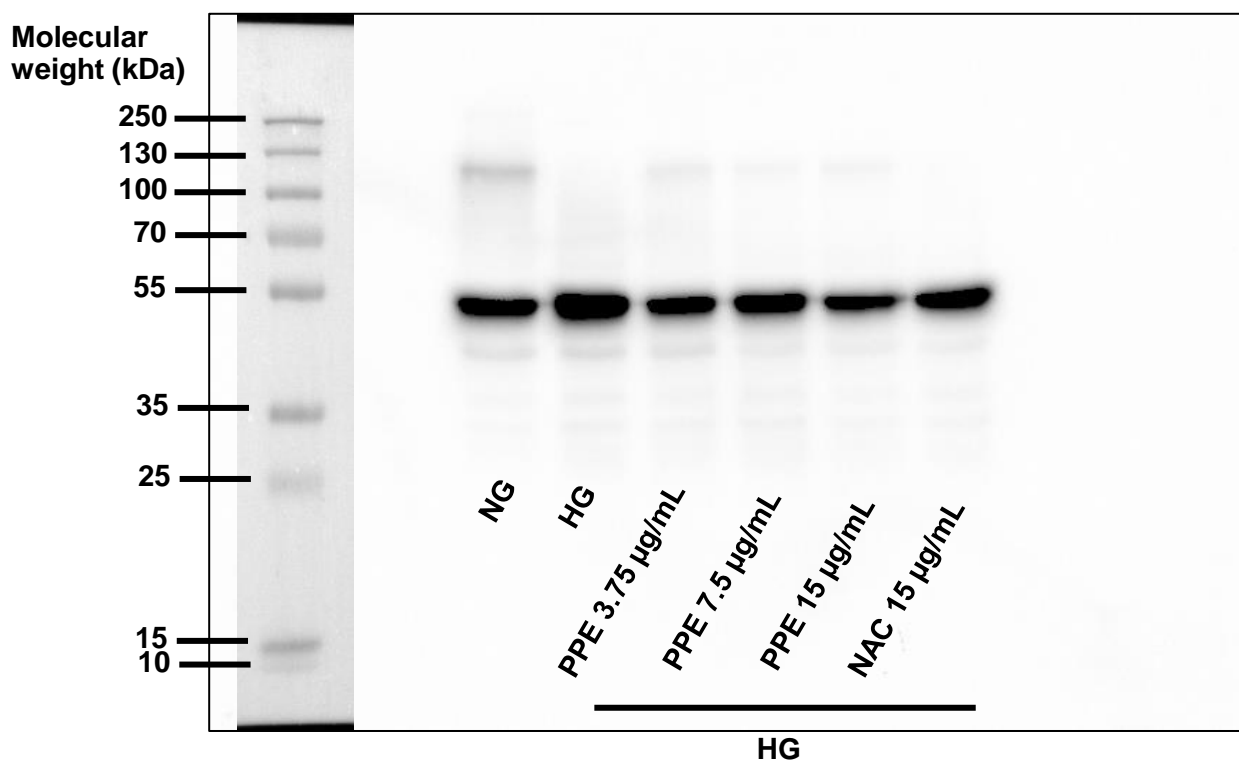

**Supplementary Figure 13** The full-length blot of p53 that is presented in figure 7

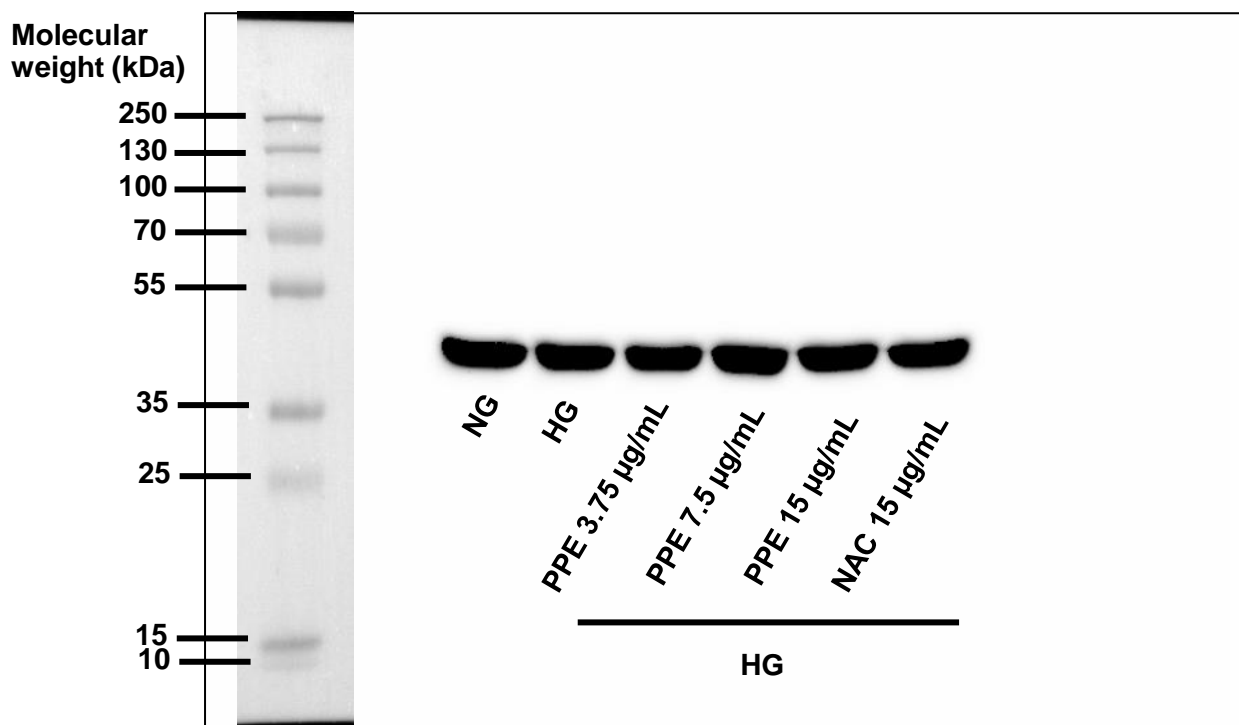

**Supplementary Figure 14** The full-length blot of  $\beta$ -actin that is presented under cropped p53 blot in figure 7

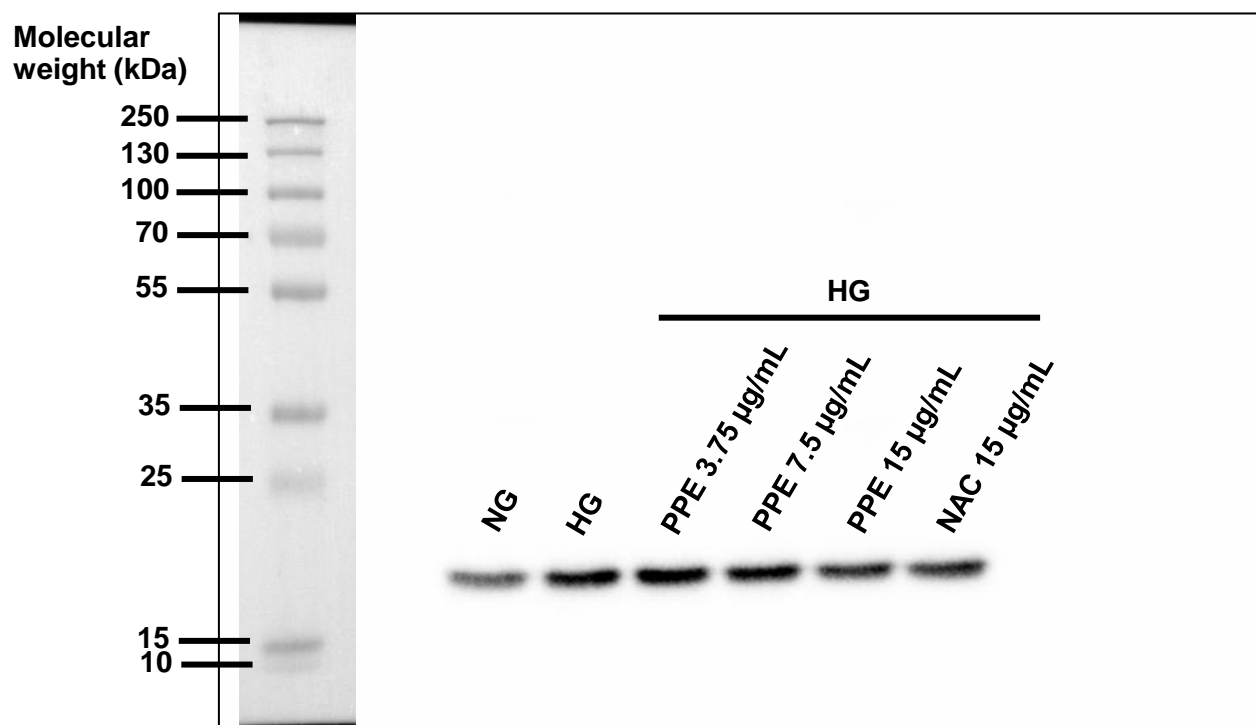

Supplementary Figure 15 The full-length blot of Bax that is presented in figure 7

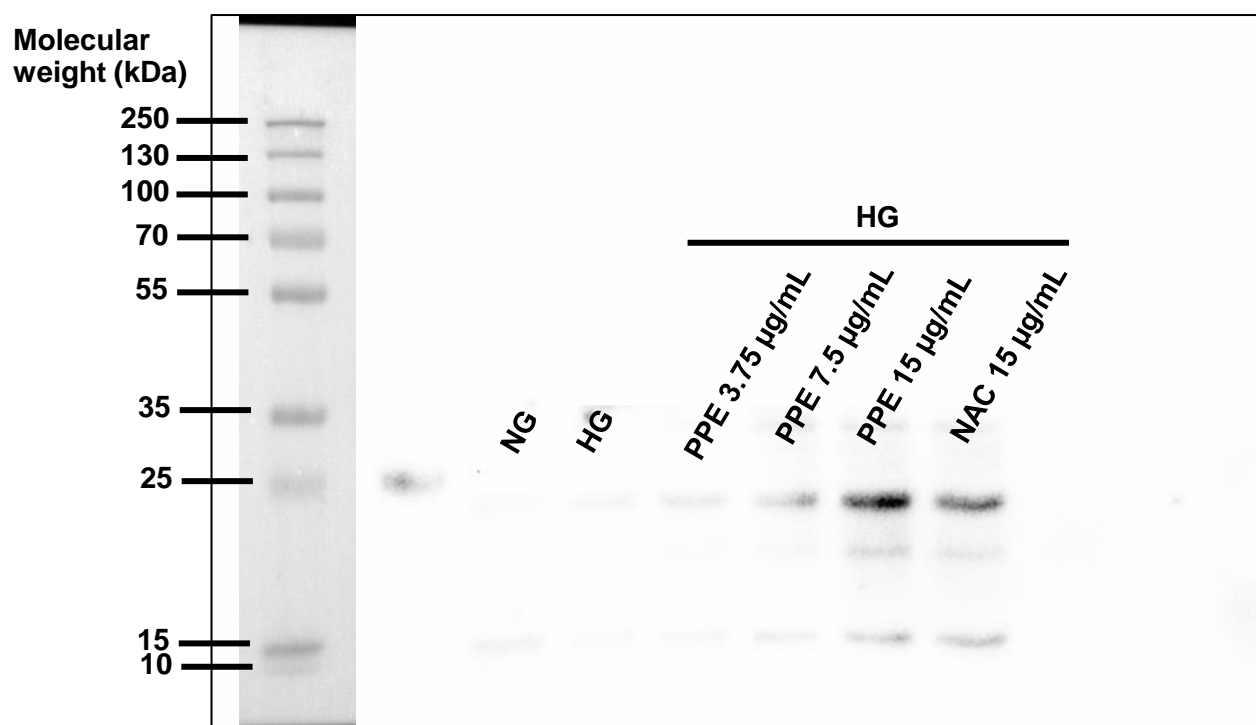

Supplementary Figure 16 The full-length blot of Bcl 2 that is presented in figure 7



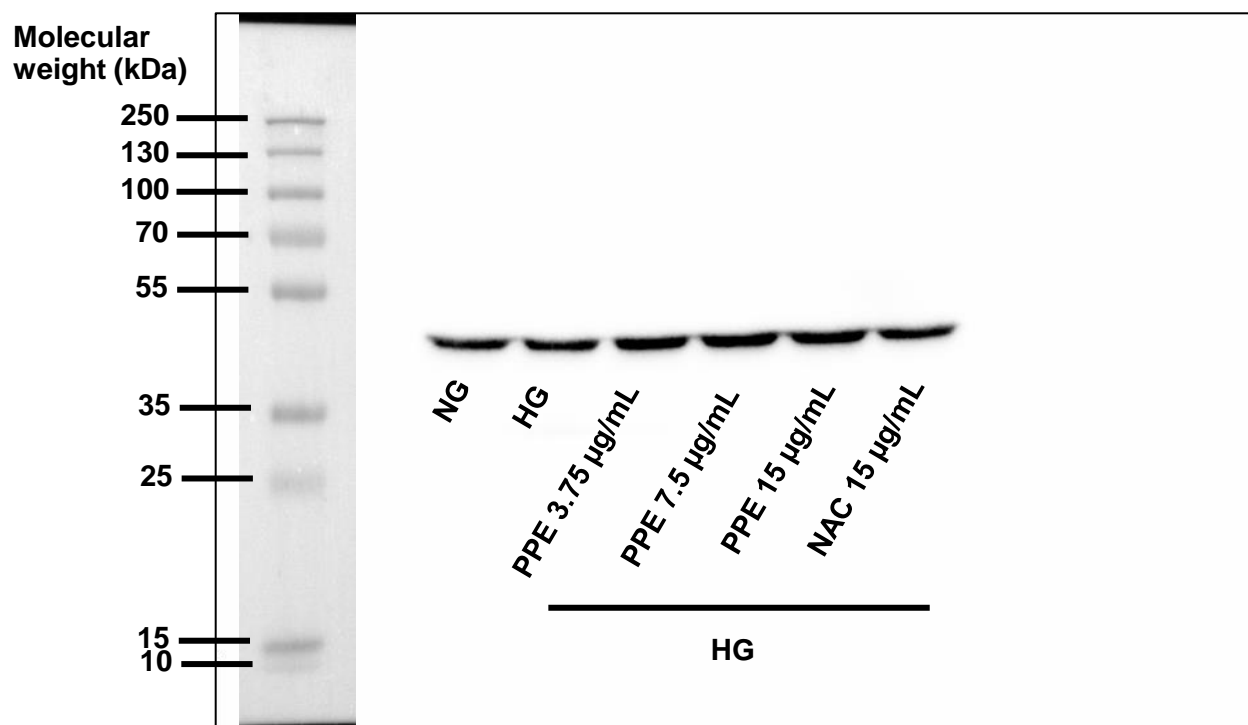

**Supplementary Figure 17** The full-length blot of  $\beta$ -actin that is presented under cropped Bax and Bcl 2 blots in figure 7

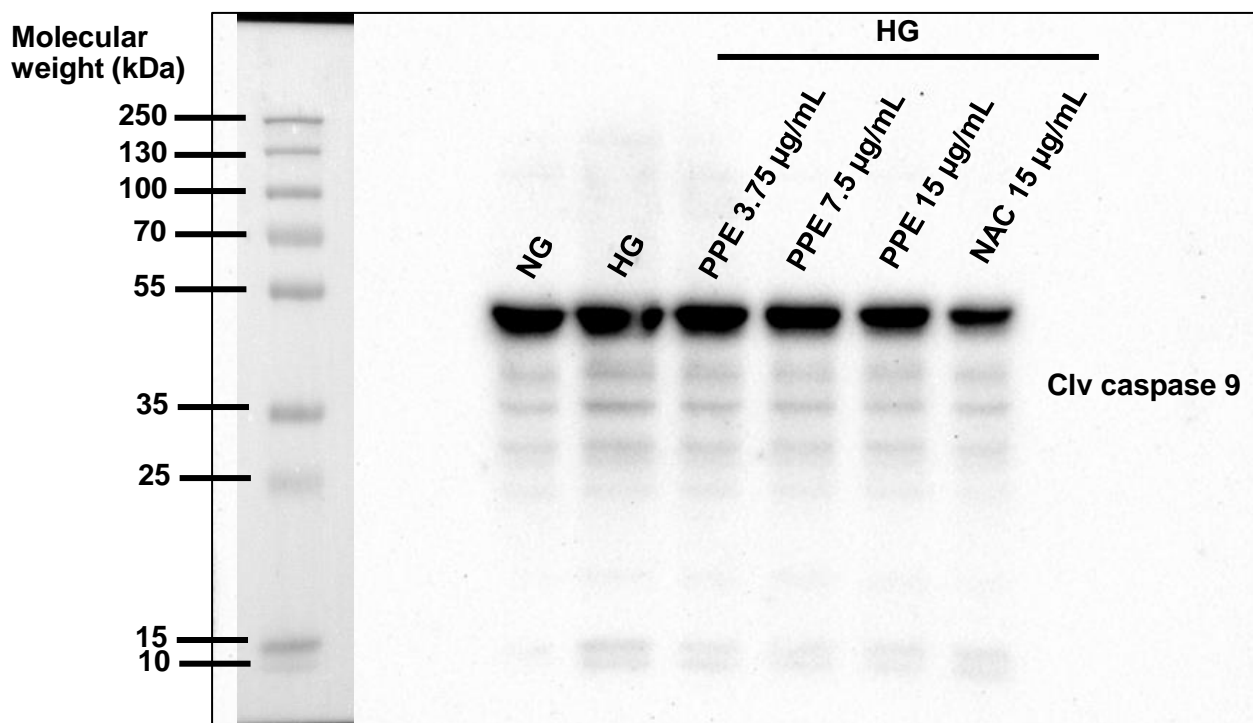

**Supplementary Figure 18** The full-length blot of caspase 9 that is presented in figure 7

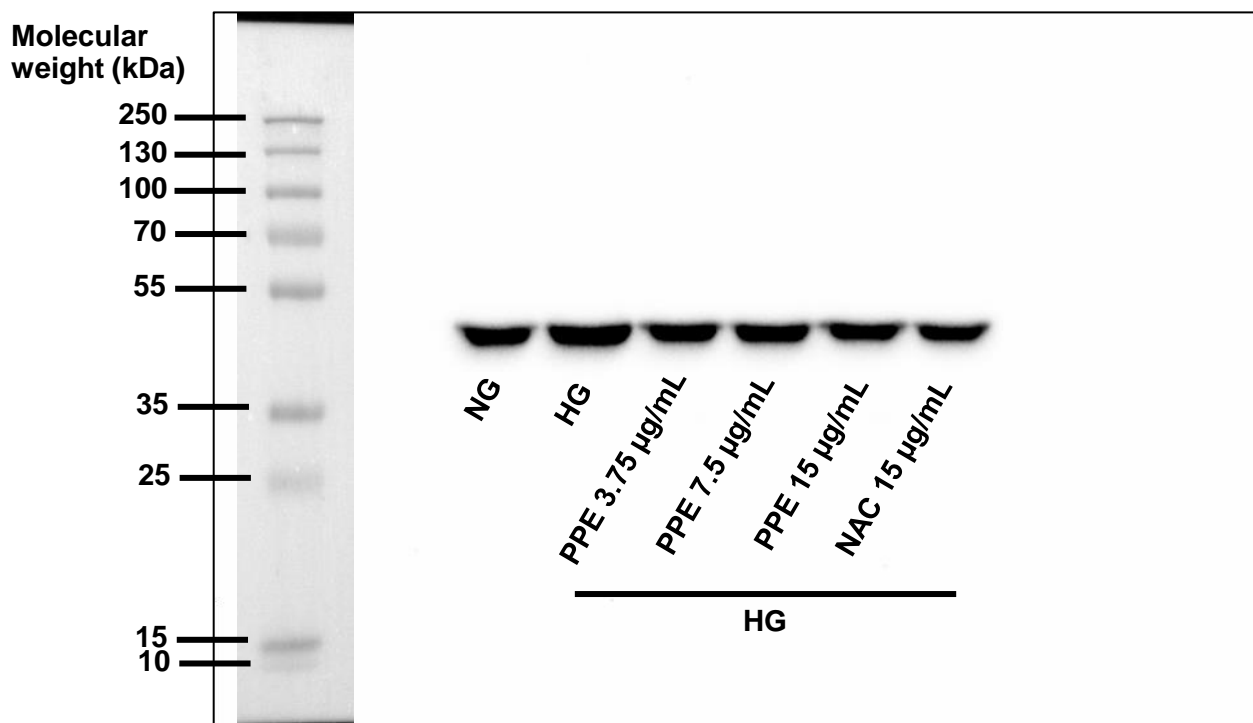

**Supplementary Figure 19** The full-length blot of  $\beta$ -actin that is presented under cropped cleaved caspase 9 blot in figure 7

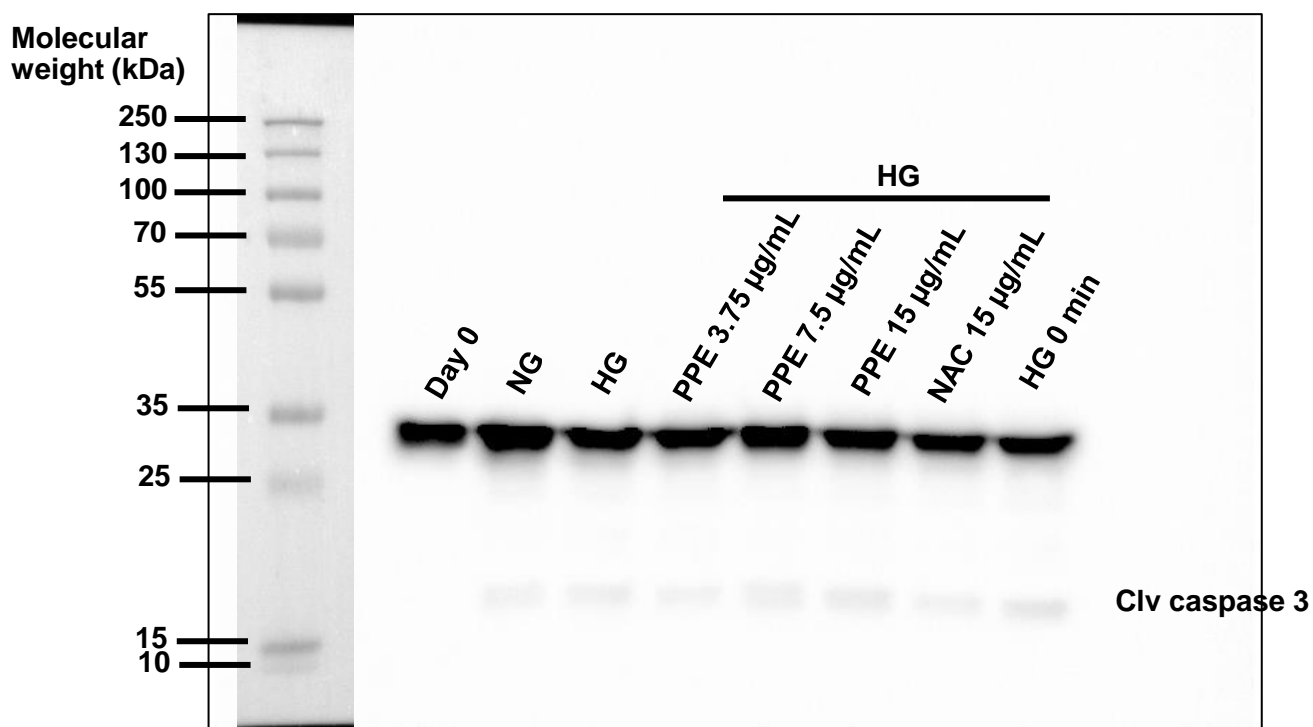

**Supplementary Figure 20** The full-length blot of caspase 3 that is presented in figure 7

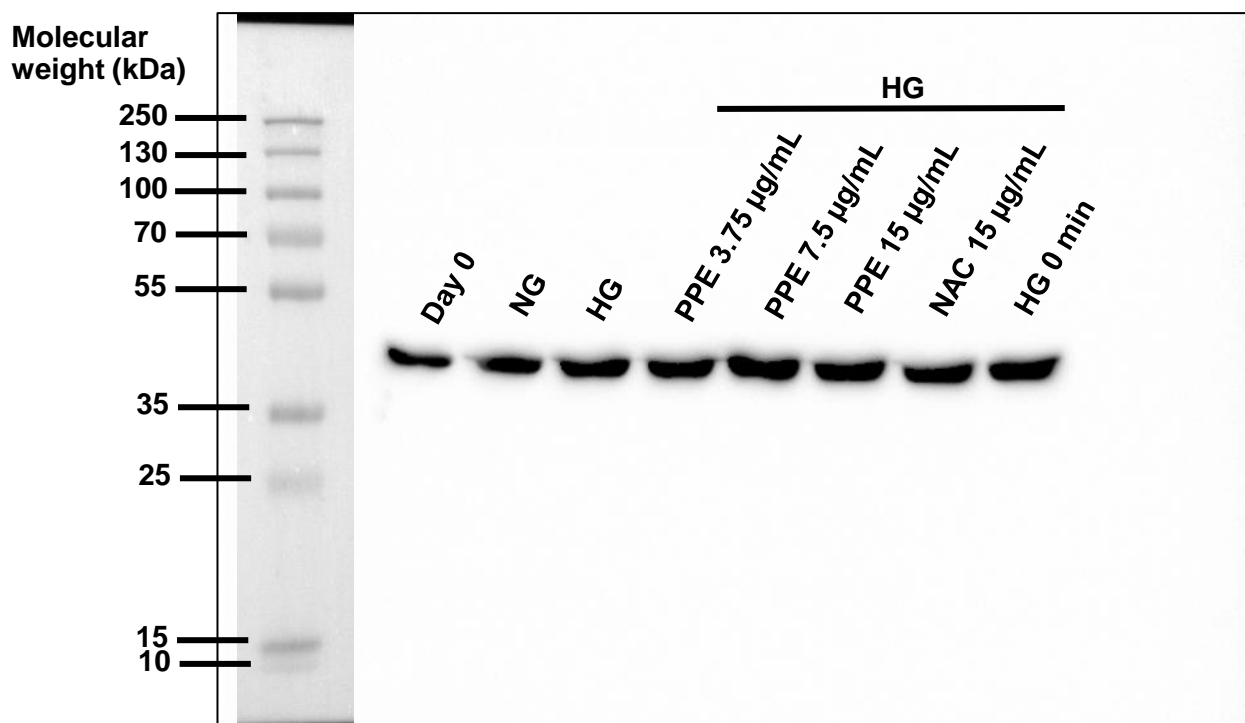

**Supplementary Figure 21** The full-length blot of  $\beta$ -actin that is presented under cropped cleaved caspase 3 in figure 7
